# Supplementary material for: Ultrastaging of the Parametrium in Cervical Cancer: A Clinicopathological Study
Source: MDPI journal article supplement (doi:10.3390/cancers15041099), 2023-02-09
Supplement: s1 [file s1]

**Ultrastaging of parametrium in cervical cancer: a clinicopathological study**

**Supplementary Table S1.** Performance of parametrial ultrastaging in predicting pelvic lymph node metastasis.

| Statistic                 | Value   | 95% CI            |
|---------------------------|---------|-------------------|
| Sensitivity               | 16.67%  | 0.42% to 64.12%   |
| Specificity               | 100.00% | 86.28% to 100.00% |
| Positive Likelihood Ratio |         |                   |
| Negative Likelihood Ratio | 0.83    | 0.58 to 1.19      |
| Disease prevalence        | 19.35%  | 7.45% to 37.47%   |
| Positive Predictive Value | 100.00% |                   |
| Negative Predictive Value | 83.33%  | 77.76% to 87.73%  |
| Accuracy                  | 83.87%  | 66.27% to 94.55%  |
